# Supplementary material for: The intramolecular blue-shifting C–H⋯F–C hydrogen bond: crystal structure of [4,4′-bis(HCF2CF2CF2CF2CH2OCH2)-2,2′-bpy]MCl2where M = Pt, Pd
Source: Royal Society of Chemistry journal article supplement (doi:10.1039/b916051e), 2009-10-01
Supplement: b916051e.pdf [file b916051e.pdf]

## Electronic Supplementary Information

### The Intramolecular Blue-shifting C-H...F-C Hydrogen Bond: Crystal Structure of [4,4'-bis(HCF<sub>2</sub>CF<sub>2</sub>CF<sub>2</sub>CF<sub>2</sub>CH<sub>2</sub>OCH<sub>2</sub>)-2,2'-bpy]MCl<sub>2</sub> Where M = Pt, Pd<sup>†</sup>

Norman Lu,<sup>a,\*</sup> Wen-Han Tu,<sup>a</sup> Yuh-Sheng Wen,<sup>b</sup> Ling-Kang Liu,<sup>b</sup> Chun-Yi Chou,<sup>c</sup> and Jyh-Chiang Jiang<sup>c</sup>

<sup>a</sup> Institute of Organic and Polymeric Materials, National Taipei University of Technology, Taipei 106, Taiwan

<sup>b</sup> Institute of Chemistry, Academia Sinica, Taipei 115, Taiwan

<sup>c</sup> Taiwan and Department of Chemical Engineering, National Taiwan University of Science and Technology, Taipei 106, Taiwan

Email: [normanlu@ntut.edu.tw](mailto:normanlu@ntut.edu.tw)

Supplementary information **A-D** is listed below. Supplementary information **A** and **B** contains the Newman projections and structural descriptions of complex **3**, respectively. Supplementary information **C** lists the calculation results of the geometrical parameters and C-H stretching bands of complex **3**. Supplementary information **D** shows the  $\pi$ - $\pi$  spacing of complex **3**.

#### Supplementary info A

For compound **3**, its structure and the Newman projections along C13-C14, C14-C15, C19-C20, and C20-C21 are shown in Fig. S1.

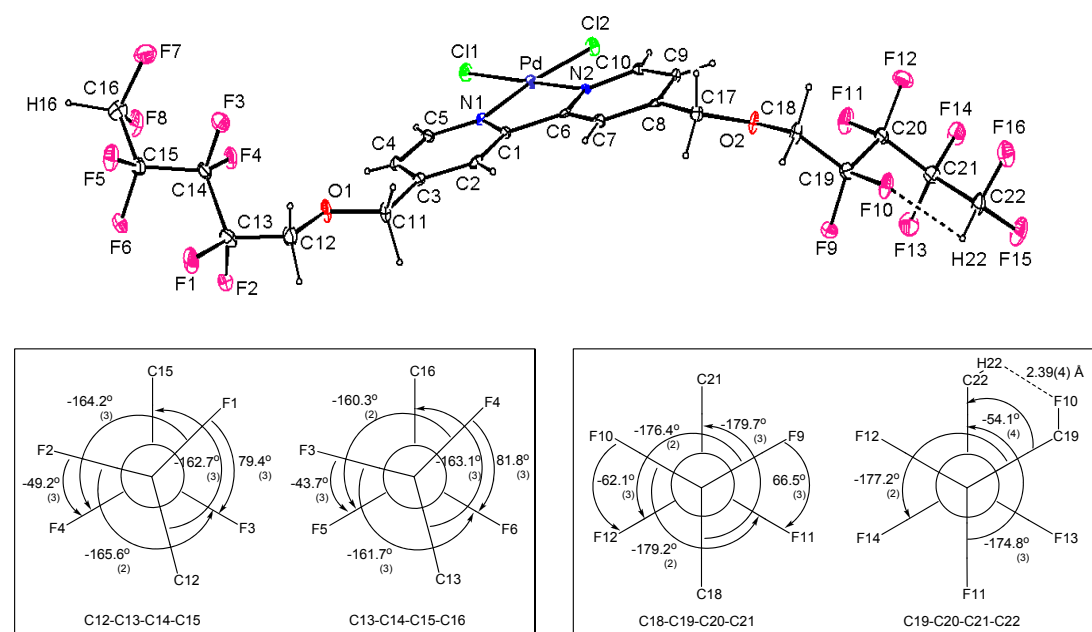

Fig. S1 Molecular plot of **3**. Selected bond lengths [Å] and angles [°]: H22...F10 2.39(4); C22-H22...F10 110(2); C22...F10 2.836(4); C19-F10 1.371(3); C19-F9 1.351(3) C22-H22 0.91(4); C16-H16 1.13(4). Insets: Newman projections of **3**.

### Supplementary info B

Reported earlier by us, the structure of **3** (CCDC 613935) was refined one more time in this manuscript, with new data set re-collected at 100 K to final R = 0.031. Different from the earlier results that include only calculated hydrogen positions for all H atoms, the current results have the positional parameters of two terminal H atoms at HCF<sub>2</sub>-group refined and their temperature factors riding according to the respective neighboring C atoms. The atom labels, with the exception of Pd, were the same as those used in **2**. In our early studies, compound **3** was found to be a very useful recyclable catalyst for use in Pd catalyzed C-C bond forming reactions, along with other fluorous analogs. The structure of **3** was included then just to establish the fact that the distal fluorous ponytails were extending away from the catalytic Pd center. As **3** is isostructural to **2**, it also exhibits the six-membered, intramolecular C-H...F-C hydrogen-bond system in one of the HCF<sub>2</sub>CF<sub>2</sub>CF<sub>2</sub>CF<sub>2</sub>CH<sub>2</sub> main chains. The C18-C19-C20-C21 fragment has a *transoidal* conformation, torsion angle being -179.7(3)°; and the adjacent C19-C20-C21-C22 a *cisoidal* conformation, torsion angle being -54.1(4)°. The terminal H22 on C22 is very close to F10 on C19, the distance being 2.39(4) Å. The remaining HCF<sub>2</sub>CF<sub>2</sub>CF<sub>2</sub>CF<sub>2</sub>CH<sub>2</sub>- main chain maintains the Gladysz type *transoidal* form.

### Supplementary info C

The geometrical parameters and the C-H stretching bands of complex **3**.

Table S1. Geometrical parameters of **3** relevant to the C-H...F-C interaction

| Distance  | Exp. (in Å, X-ray) | Calc. (in Å) |
|-----------|--------------------|--------------|
| H22...F10 | 2.39(4)            | 2.438        |
| C22-H22   | 0.91(4)            | 1.105        |
| C16-H16   | 1.13(4)            | 1.108        |
| C19-F10   | 1.371(3)           | 1.400        |
| C19-F9    | 1.351(3)           | 1.384        |

Table S2. The C-H stretching bands (in cm<sup>-1</sup>) of **3** and the assignments

| Exp.                 | Calc.      |           | Assignment                  |
|----------------------|------------|-----------|-----------------------------|
|                      | unfactored | factored* |                             |
| 3123<br>3092<br>3076 | 3074       | 3120      | Pyridyl C-H's               |
|                      | 3067       | 3113      |                             |
|                      | 3042       | 3087      |                             |
|                      | 3034       | 3080      |                             |
|                      | 3013       | 3058      |                             |
| 3002                 | 2956       | 3000      | HCF <sub>2</sub> , H bonded |
|                      | 2950       | 2956      | HCF <sub>2</sub> , free     |
| 2932<br>2894         | 2896       | 2939      | Methylene C-H's             |
|                      | 2887       | 2930      |                             |
|                      | 2847       | 2890      |                             |
|                      | 2840       | 2883      |                             |
|                      | 2838       | 2881      |                             |
|                      | 2832       | 2874      |                             |
| 2855                 | 2807       | 2849      |                             |
|                      | 2825       | 2831      |                             |

\*The scaling factor is 1.015.

Supplementary info **D**

The side view of the fluororous ponytailed bpy planes in the crystal structure of **3**.

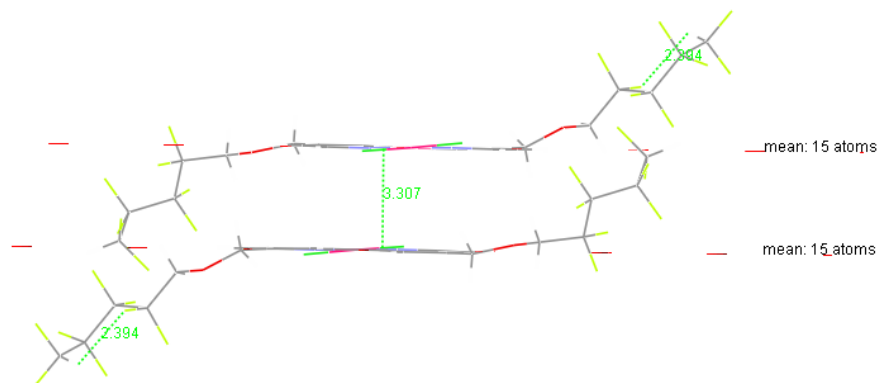

Fig. S2. The interactions along the normal of bpy planes in the crystal structure of **3**. The separation between bpy planes is 3.307(4) Å. A bpy plane was defined by the C and N atoms of bpy and PdCl<sub>2</sub>.
